# Supplementary material
Source: Springer Nature journal article supplement (https://www.springermedizin.de/resource/supplementary/12958_2005_236_MOESM1_ESM.pdf/9567428)
Supplement: MOESM1 [file 9567428]

Extracellular environment

Metal binding proteins

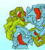

Antioxidant compounds  
( $\alpha$ -tocopherol,  $\beta$ -carotene, urate...)

-ve

-ve

Transition metal ions  
 $Fe^{++}$ ,  $Cu^{++}$ ...

Oxidants

**Oxidative Stress**

-ve

Antioxidant enzymes

Lipid peroxidation

Protein cross-linking

Normal cell

Direct repair  
(reduction of  
oxidized molecules)

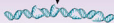

- DNA strand breaks
- Mutations

Indirect repair  
(replacement of  
oxidized molecules)

Oxidatively  
damaged cell

Apoptosis

Necrosis

Cellular environment
